# Supplementary material for: Digestive glycosidases from cannonball jellyfish (Stomolophus sp. 2): identification and temporal-spatial variability
Source: PeerJ. 2023 Dec 19;11:e16417. doi: 10.7717/peerj.16417 (PMC10740595; doi:10.7717/peerj.16417)
Supplement: Supplemental Information 2 — Raw data from protein and enzymatic analysis used to plot the graphs or create tables. [file peerj-11-16417-s002.xlsx]

## Sheet: Protein
Protein quantification by Bradford method
Organism	Protein (mg/ml)	SD	mg/mg tissue		mg of protein/g drye tissue	SD
1	2.86672	0.0734893	0.0573344	0.00146979	57.3344	1.46979
2	1.80083	0.0660496	0.0360166	0.00132099	36.0166	1.32099
3	1.32421	0.0194434	0.0264842	0.000388869	26.4842	0.388869
4	1.83477	0.121226	0.0366955	0.00242453	36.6955	2.42453
5	1.36381	0.0690025	0.0272761	0.00138005	27.2761	1.38005
6	1.73323	0.0324057	0.0346645	0.000648115	34.6645	0.648115
7	3.32113	0.431	0.0664227	0.00861999	66.4227	8.61999
8	1.79139	0.0735531	0.0358278	0.00147106	35.8278	1.47106
9	1.04791	0.0392831	0.0209582	0.000785662	20.9582	0.785662
10	0.818085	0.0246078	0.0163617	0.000492156	16.3617	0.492156
11	1.37258	0.014143	0.0274516	0.00028286	27.4516	0.28286
12	1.18501	0.0401585	0.0237002	0.000803169	23.7002	0.803169
13	1.13045	0.00648115	0.022609	0.000129623	22.609	0.129623
14	0.805162	0.142143	0.0161032	0.00284285	16.1032	2.84285
15	1.28646	0.112848	0.0257292	0.00225697	25.7292	2.25697
16	1.39916	0.0401895	0.0279833	0.000803789	27.9833	0.803789
17	2.20843	0.106073	0.0441687	0.00212145	44.1687	2.12145
18	1.41353	0.015665	0.0282706	0.0003133	28.2706	0.3133
19	2.80951	0.0489929	0.0561902	0.000979857	56.1902	0.979857
20	3.69345	0.288028	0.073869	0.00576057	73.869	5.76057
21	3.87298	0.160758	0.0774596	0.00321516	77.4596	3.21516
22	3.64395	0.200512	0.072879	0.00401024	72.879	4.01024
23	4.11774	0.716599	0.0823548	0.014332	82.3548	14.332

## Sheet: Bgluc
β-glucosidase activity
Organism sample	Activity	SD
	(mU/mg dry tissue)
1	0.0696681	0.0322302
2	-	-
3	-	-
4	-	-
5	0.0581125	0.00402279
6	0.15451	0.0153811
7	0.0568961	0.00750032
8	-	-
9	-	-
10	-	-
11	-	-
12	-	-
13	-	-
14	-	-
15	-	-
16	-	-
17	-	-
18	0.0857851	0.015971
19	-	-
20	-	-
21	0.141637	0.00279137
22	0.0979489	0.00488764
23	0.111937	0.00282188
Media	0.0970619	0.0107008

## Sheet: Nhasa
β-N-acetylhexosaminidase activity
Organism sample	Activity	SD
	(mU/mg dry tissue)
1	8.15504	0.0548145
2	4.67528	0.74783
3	1.27735	0.0860249
4	7.8062	0.227111
5	6.10508	0.305832
6	8.86563	0.116279
7	7.52627	0.375863
8	4.36951	0.233632
9	2.81912	0.100908
10	2.99139	0.159462
11	3.76227	0.0645995
12	3.76658	0.100355
13	3.85271	0.0719349
14	4.19724	0.0325144
15	2.98708	0.116279
16	5.86822	0.254492
17	6.21275	0.247285
18	6.8286	0.0197355
19	2.89233	0.268639
20	7.26357	0.314355
21	7.82343	0.896638
22	6.43669	0.344019
23	5.50215	0.141727
Media	5.30367	0.22958

## Sheet: Chitinase
Chitinase activity
Organism sample	Activity	SD
	(mU/mg dry tissue)
1	-	-
2	-	-
3	0.0325492	0.00353381
4	0.00685247	0.00545351
5	-	-
6	0.0418169	0.0050791
7	-	-
8	-	-
9	-	-
10	-	-
11	-	-
12	-	-
13	-	-
14	0.0343747	0.00729641
15	0.0109246	0.00477908
16	-	-
17	0.0333917	0.000405356
18	-	-
19	0.0394298	0.00879725
20	0.0388681	0.00146153
21	0.0362001	0.00346336
22	0.0369022	0.00390911
23	-	-
Media	0.031131	0.00441785

## Sheet: Individual compilation
Sampling Data
	Mass	Diameter	Protein	β-glucosidase		β-N-acetylhexosaminidase		Chitinase		β-glucosidase		β-N-acetylhexosaminidase		Chitinase		β-N-acetylhexosaminidase
Organisms	(g)	(mm)	(mg/mL)	(mU/mg tejido)	SD	(mU/mg tejido)	SD	(mU/mg tejido)	SD	(mU/g tejido)	SD	(mU/g tejido)	SD	(mU/g tejido)	SD	(U/g tejido)	SD
1	441	93	2.86672	0.0696681	0.0322302	8.15504	0.0548145	0	0	69.6681	32.2302	8155.04	54.8145	-	-	8.15504	0.0548145
2	194	77	1.80083	0	0	4.67528	1.24638	0	0	0	0	4675.28	1246.38	-	-	4.67528	1.24638
3	236	83	1.32421	0	0	1.27735	0.143375	0.0325492	0.00353381	0	0	1277.35	143.375	32.5492	3.53381	1.27735	0.143375
4	288	84	1.83477	0	0	7.8062	0.378518	0.00685247	0.00545351	0	0	7806.2	378.518	6.85247	5.45351	7.8062	0.378518
5	364	94	1.36381	0.0581125	0.00402279	6.10508	0.509719	0	0	58.1125	4.02279	6105.08	509.719	-	-	6.10508	0.509719
6	490	98	1.73323	0.15451	0.0153811	8.86563	0.193798	0.0418169	0.0050791	154.51	15.3811	8865.63	193.798	41.8169	5.0791	8.86563	0.193798
7	380	95	3.32113	0.0568961	0.00750032	7.52627	0.626439	0	0	56.8961	7.50032	7526.27	626.439	-	-	7.52627	0.626439
8	250	82	1.79139	0	0	4.36951	0.389387	0	0	0	0	4369.51	389.387	-	-	4.36951	0.389387
9	267	80	1.04791	0	0	2.81912	0.168179	0	0	0	0	2819.12	168.179	-	-	2.81912	0.168179
10	105	61	0.818085	0	0	2.99139	0.26577	0	0	0	0	2991.39	265.77	-	-	2.99139	0.26577
11	235	80	1.37258	0	0	3.76227	0.107666	0	0	0	0	3762.27	107.666	-	-	3.76227	0.107666
12	231	81	1.18501	0	0	3.76658	0.167258	0	0	0	0	3766.58	167.258	-	-	3.76658	0.167258
13	248	79	1.13045	0	0	3.85271	0.119892	0	0	0	0	3852.71	119.892	-	-	3.85271	0.119892
14	400	97	0.805162	0	0	4.19724	0.0541906	0.0343747	0.00729641	0	0	4197.24	54.1906	34.3747	7.29641	4.19724	0.0541906
15	200	79	1.28646	0	0	2.98708	0.193798	0.0109246	0.00477908	0	0	2987.08	193.798	10.9246	4.77908	2.98708	0.193798
16	330	87	1.39916	0	0	5.86822	0.424154	0	0	0	0	5868.22	424.154	-	-	5.86822	0.424154
17	316	87	2.20843	0	0	6.21275	0.412141	0.0333917	0.000405356	0	0	6212.75	412.141	33.3917	0.405356	6.21275	0.412141
18	380	95	1.41353	0.0857851	0.015971	6.8286	0.0328924	0	0	85.7851	15.971	6828.6	32.8924	-	-	6.8286	0.0328924
19	350	93	2.80951	0	0	2.89233	0.447731	0.0394298	0.00879725	0	0	2892.33	447.731	39.4298	8.79725	2.89233	0.447731
20	460	97	3.69345	0	0	7.26357	0.523924	0.0388681	0.00146153	0	0	7263.57	523.924	38.8681	1.46153	7.26357	0.523924
21	445	98	3.87298	0.141637	0.00279137	7.82343	1.4944	0.0362001	0.00346336	141.637	2.79137	7823.43	1494.4	36.2001	3.46336	7.82343	1.4944
22	467	98	3.64395	0.0979489	0.00488764	6.43669	0.573365	0.0369022	0.00390911	97.9489	4.88764	6436.69	573.365	36.9022	3.90911	6.43669	0.573365
23	436	96	4.11774	0.111937	0.00282188	5.50215	0.236211	0	0	111.937	2.82188	5502.15	236.211	0	0	5.50215	0.236211
Media	326.652	87.5652	2.03654	0.0337607	0.00372201	5.30367	0.381044	0.0135352	0.00192081	33.7607	3.72201	5303.67	381.044	28.3009	4.01623
Mix of 23 organisms				0.374	0.0103	3.645	0.1981	0.024	0	374

## Sheet: Optimum
	Kinetic assays
	Chitinase		β-N-acetylhexosaminidase		β-glucosidase
Ionic strength (NaCl; M)	Relative activity		Relative activity		Relative activity
	%	standard deviation	%	standard deviation	%	standard deviation
0	100	1.55645	100	4.25665	100	6.25412
1	173.605	3.76762	208.963	6.98067	106.822	9.47701
2	213.308	5.48194	181.248	6.15212	113.391	2.65285
3	228.023	8.28315	187.163	2.46206	125.392	6.58959
4	186.316	5.50957	86.0188	5.10356	146.109	4.48948
	Kinetic assays
	Chitinase		β-N-acetylhexosaminidase		β-glucosidase
pH	Relative activity		Relative activity		Relative activity
	%	standard deviation	%	standard deviation	%	standard deviation
3	58.0767	0.184546	N/D	N/D	N/D	N/D
4	61.2755	0.928862	N/D	N/D	N/D	N/D
5	100	1.55645	274.046	13.5093	100	11.0504
6	53.7157	0.731775	100	4.25665	71.7065	11.8523
7	61.9246	0.165707	54.9844	1.03656	14.2284	1.70154
8	64.5207	0.912642	16.8217	0.956691	5.61414	0.445567
9	54.9862	0.422491	6.28731	0.274652	7.17362	1.17886
10	77.9462	0.384164	N/A	N/A	N/A	N/A
N/A: not available
	End point assays
	Chitinase		β-N-acetylhexosaminidase		β-glucosidase
Temperature	Relative activity		Relative activity		Relative activity
(°C)	%	standard deviation	%	standard deviation	%	standard deviation
4	76.307	1.19356	19.0239	0.828301	10.706	0.802743
25	80.5341	1.2135	43.6963	1.33743	37.7414	0.744914
30	107.816	1.51003	69.0014	2.61464	64.6223	3.51693
37	100	1.55645	100	5.35658	100	2.76464
40	64.0303	1.19356	201.582	0.813376	95.5199	2.89433
50	67.0181	1.42096	110.122	2.51918	137.309	6.55573
60	N/A	N/A	53.005	2.31649	100.463	6.3982
70	N/A	N/A	53.005	2.31649	19.6663	1.31768
80	N/A	N/A	50.7456	2.19148	22.3698	1.35782
N/A: not available

## Sheet: Annual, Inter and Intra localit
		Chitinase		β-N-acetylhexosaminidase		β-glucosidase						Chitinase		β-N-acetylhexosaminidase		β-glucosidase
Year	Site	mU/mg dry tissue	Desv Est	mU/mg dry tissue	Desv Est	mU/mg dry tissue	Desv Est			Year	Site	mU/mg dry tissue	Desv Est	mU/mg dry tissue	Desv Est	mU/mg dry tissue	Desv Est
2015	Guásimas	0.024	0	3.645	0.1981	0.374	0.0103			2015	Guásimas	24.276	0.377845	3645	198.1	374	10.3
2016	Guásimas	0.037	0.001	3.84824	0.156562	2.19544	0.0842064			2016	Guásimas	36.889	0.902943	3848.24	156.562	2195.44	84.2064
2016	Hermosillo	0.025	0	2.98857	0.0879618	0.871	0.0228			2016	Hermosillo	25.1486	0.390136	2988.57	87.9618	871	22.8
2016	Puerto Peñasco	0.022	0	3.26173	0.281113	1.16363	0.0267236			2016	Puerto Peñasco	21.8169	0.214513	3261.73	281.113	1163.63	26.7236
		Chitinase		β-N-acetylhexosaminidase		β-glucosidase						Chitinase		β-N-acetylhexosaminidase		β-glucosidase		Chitinase		β-N-acetylhexosaminidase		β-glucosidase
		tissue activity		tissue activity		tissue activity						tissue activity		tissue activity		tissue activity		tissue activity		tissue activity		tissue activity
Zone	Organism	mU/mg dry tissue	Desv Est	mU/mg dry tissue	Desv Est	mU/mg dry tissue	Desv Est			Zone	Organism	mU/mg dry tissue	Desv Est	mU/mg dry tissue	Desv Est	mU/mg dry tissue	Desv Est	mU/mg dry tissue	Desv Est	mU/mg dry tissue	Desv Est	mU/mg dry tissue	Desv Est
1	1	0.0198337	9.08804e-05	2.3649	0.0954189	1.1459	0.0155698			1	1	19.8337	0.0908804	2364.9	95.4189	1145.9	15.5698	20.1114	0.130234	3054.54	127.532	966.295	37.4429
1	2	0.0192983	0.00020894	3.3318	0.128298	0.803341	0.0465512			1	2	19.2983	0.20894	3331.8	128.298	803.341	46.5512
1	3	0.0212021	9.08804e-05	3.46691	0.158879	0.949645	0.0502077			1	3	21.2021	0.0908804	3466.91	158.879	949.645	50.2077
2	1	0.0224713	0.000178486	3.29009	0.134129	1.07349	0.0270888			2	1	22.4713	0.178486	3290.09	134.129	1073.49	27.0888	23.8199	0.304309	3385.59	118.632	1254.27	28.5151
2	2	0.0237604	0.000338304	4.0291	0.142637	1.61289	0.0362893			2	2	23.7604	0.338304	4029.1	142.637	1612.89	36.2893
2	3	0.0252279	0.000396138	2.83758	0.079131	1.07644	0.0221672			2	3	25.2279	0.396138	2837.58	79.131	1076.44	22.1672
3	1	0.0202105	0.000157409	1.47421	0.136155	0.602062	0.0319701			3	1	20.2105	0.157409	1474.21	136.155	602.062	31.9701	21.612	0.15241	2113.42	128.872	702.554	24.3151
3	2	0.0227886	9.08804e-05	1.38601	0.09782	0.733588	0.0267236			3	2	22.7886	0.0908804	1386.01	97.82	733.588	26.7236
3	3	0.0218367	0.00020894	3.48005	0.15264	0.772011	0.0142515			3	3	21.8367	0.20894	3480.05	152.64	772.011	14.2515
	Activity (mU/mg dry tissue)														Activity (mU/g dry tissue)
year	Chitinase	β-N-acetylhexosaminidase	β-glucosidase	Locality	Chitinase	β-N-acetylhexosaminidase	β-glucosidase	Point	Chitinase	β-N-acetylhexosaminidase	β-glucosidase			year	Chitinase	β-N-acetylhexosaminidase	β-glucosidase	Locality	Chitinase	β-N-acetylhexosaminidase	β-glucosidase	Point	Chitinase	β-N-acetylhexosaminidase	β-glucosidase
2015	0.0244942	3.68205	0.369503	Guaymas	0.0370477	3.72289	2.22648	1	0.0198337	2.3649	1.1459			2015	24.4942	3682.05	369.503	Guaymas	37.0477	3722.89	2226.48	1	19.8337	2364.9	1145.9
2015	0.0238397	3.43143	0.366902	Guaymas	0.0377021	3.7981	2.25973	1	0.0192983	3.3318	0.803341			2015	23.8397	3431.43	366.902	Guaymas	37.7021	3798.1	2259.73	1	19.2983	3331.8	803.341
2015	0.0244942	3.8224	0.385976	Guaymas	0.0359172	4.02373	2.10013	1	0.0212021	3.46691	0.949645			2015	24.4942	3822.4	385.976	Guaymas	35.9172	4023.73	2100.13	1	21.2021	3466.91	949.645
2016	0.0370477	3.72289	2.22648	Hermosillo	0.0247916	2.89216	0.890237	2	0.0224713	3.29009	1.07349			2016	37.0477	3722.89	2226.48	Hermosillo	24.7916	2892.16	890.237	2	22.4713	3290.09	1073.49
2016	0.0377021	3.7981	2.25973	Hermosillo	0.0250891	3.00908	0.876936	2	0.0237604	4.0291	1.61289			2016	37.7021	3798.1	2259.73	Hermosillo	25.0891	3009.08	876.936	2	23.7604	4029.1	1612.89
2016	0.0359172	4.02373	2.10013	Hermosillo	0.0255651	3.06446	0.845902	2	0.0252279	2.83758	1.07644			2016	35.9172	4023.73	2100.13	Hermosillo	25.5651	3064.46	845.902	2	25.2279	2837.58	1076.44
-	-	-	-	Peñasco	0.0219954	3.10181	1.19171	3	0.0202105	1.47421	0.602062							Peñasco	21.9954	3101.81	1191.71	3	20.2105	1474.21	602.062
-	-	-	-	Peñasco	0.0215789	3.09706	1.13851	3	0.0227886	1.38601	0.733588							Peñasco	21.5789	3097.06	1138.51	3	22.7886	1386.01	733.588
-	-	-	-	Peñasco	0.0218764	3.58632	1.16068	3	0.0218367	3.48005	0.772011							Peñasco	21.8764	3586.32	1160.68	3	21.8367	3480.05	772.011

## Sheet: statistics
Mann-Whitney-Wilcoxon test					Kruskal-Wallis test					Kruskal-Wallis test
					Inter-locality						Intra-locality
	Media (mU/g dry tissue)					Media (mU/g dry tissue)					Media (mU/g dry tissue)
Year	Chitinase	β-N-acetylhexosaminidase	β-glucosidase		Localidad	Chitinase	β-N-acetylhexosaminidase	β-glucosidase		Point	Chitinase	β-N-acetylhexosaminidase	β-glucosidase
2015	24.4942	3682.05	369.503		Guasimas	37.0477	3798.1	2226.48		1	19.8337	3331.8	949.645
2016	37.0477	3798.1	2226.48		Hillo	25.0891	3009.08	876.936		2	23.7604	3290.09	1076.44
W	9	7	9		Peñasco	21.8764	3101.81	1160.68		3	21.8367	1474.21	733.588
P value (95)	0.0765221	0.382731	0.0808552		Estadístico	7.2	7.2	7.2		Estadístico	5.68889	1.15556	5.95556
Ho	Accepted	Accepted	Acccepted		Pvalor (95)	0.027	0.027	0.027		P value(95)	0.0581	0.56114	0.0509
					Ho	Rejected	Rejected	Rejected		Ho	Accepted	Accepted	Accepted
						All differents	HP y PG	All differents			No significant differences
